# Supplementary material for: Preventive Effects of a Human Hematopoietic Mesenchymal Stem Cell (hHMSC) Therapy in Ovalbumin-Induced Food Allergy
Source: MDPI journal article supplement (doi:10.3390/biomedicines10020511), 2022-02-21
Supplement: s1 [file s1]

Supplementary table

**Table S1. Gene information.**

| No. | Gene                            | Gene Symbol | Accession No. (species)             |                   |
|-----|---------------------------------|-------------|-------------------------------------|-------------------|
| 1   | <i>IL-4</i>                     | Il4         | NM_021283.2 ( <i>Mus musculus</i> ) |                   |
| 2   | <i>IL-5</i>                     | Il5         | NM_010558.1 ( <i>Mus musculus</i> ) |                   |
| 3   | <i>IL-13</i>                    | Il13        | NM_008355.3 ( <i>Mus musculus</i> ) |                   |
| 4   | <i>IL-10</i>                    | Il10        | NM_010548.2 ( <i>Mus musculus</i> ) |                   |
| 5   | <i>TGF- <math>\beta</math>1</i> | Tgfb1       | NM_011577.2 ( <i>Mus musculus</i> ) |                   |
| 6   | <i>IL-23</i>                    | Il23a       | NM_031252.2 ( <i>Mus musculus</i> ) |                   |
| 7   | <i>IL-31</i>                    | Il31        | NM_029594.1 ( <i>Mus musculus</i> ) |                   |
| 8   | <i>IFN-<math>\gamma</math></i>  | Ifng        | NM_008337.4 ( <i>Mus musculus</i> ) |                   |
| 9   | <i>IL-12</i>                    | Il12a       | NM_008351.3 ( <i>Mus musculus</i> ) |                   |
| 10  | <i>Actb</i>                     | Actb        | NM_007393.5 ( <i>Mus musculus</i> ) | Reference<br>gene |

**Table S2. Comparison of ear skin thickness, mast cell counts of ear skin, small intestine and spleen weight.**

|                                                    | Control            | OVA                | OVA+MSC            | OVA+MSC CM          |
|----------------------------------------------------|--------------------|--------------------|--------------------|---------------------|
| Ear skin thickness ( $\mu$ M)                      | 264.03 $\pm$ 10.74 | 356.13 $\pm$ 48.39 | 346.96 $\pm$ 28.20 | 313.20 $\pm$ 26.53* |
| Mast cell counts of ear<br>skin (Cells/HPF)        | 3.17 $\pm$ 1.94    | 9.00 $\pm$ 3.81    | 6.00 $\pm$ 5.34    | 5.33 $\pm$ 2.61     |
| Mast cell counts of small<br>intestine (Cells/HPF) | 1.30 $\pm$ 1.20    | 6.00 $\pm$ 1.28    | 3.90 $\pm$ 1.90    | 3.5 $\pm$ 2.30      |
| Spleen weight (g)                                  | 0.26 $\pm$ 0.03    | 0.39 $\pm$ 0.05    | 0.31 $\pm$ 0.04    | 0.33 $\pm$ 0.04     |

Mean $\pm$ SD. \* : P < 0.05 versus G2. Cells/HPF, mast cells per high power field (x400)  
MSC, mesenchymal stem cell; MSC CM, mesenchymal stem cell culture medium; OVA, Ovalbumin
